# Supplementary material for: Systemic inflammation score predicts survival in patients with intrahepatic cholangiocarcinoma undergoing curative resection
Source: PubMed Central journal article supplement — J Cancer. 2019 Jan 1;10(2):494–503. doi: 10.7150/jca.26890 (PMC6360305; doi:10.7150/jca.26890), 2019-01-01
Supplement: jcav10p0494s1.pdf [file jcav10p0494s1.pdf]

## Supplementary file

### Supplementary Figures

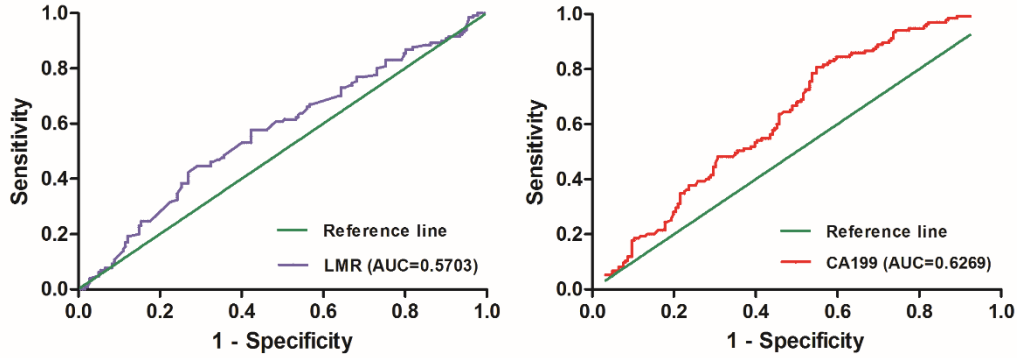

**Supplementary Figure 1.** Receiver operating characteristics (ROC) curves assessing the cut-off of LMR (left), and CA19-9 (right) for predicting the overall survival in the training cohort (Cohort 1,  $n=322$ ).

The AUCs for each parameter LMR, and CA19-9 were 0.5703 (0.5056-0.6351,  $P=0.034$ ), and 0.6269 (0.5665-0.6873,  $P=0.0001$ ), respectively. LMR=lymphocyte to monocyte ratio, AUC, indicates area under the ROC curve.

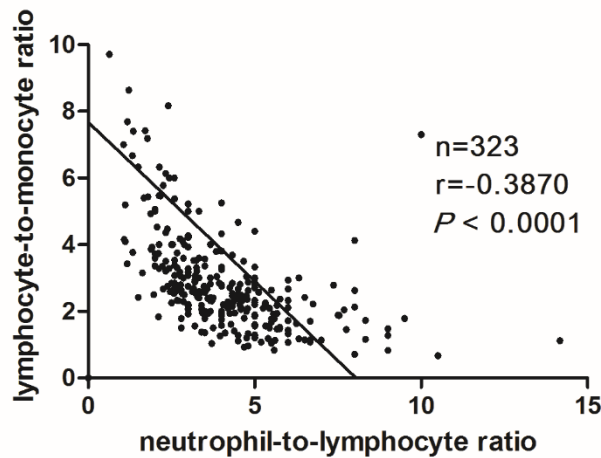

**Supplementary Figure 2.** Negative correlation between lymphocyte-to-monocyte ratio and neutrophil-to-lymphocyte ratio in ICC patients (Cohort 1,  $n=322$ ,  $r=-0.3870$ ,  $P < 0.0001$ ).

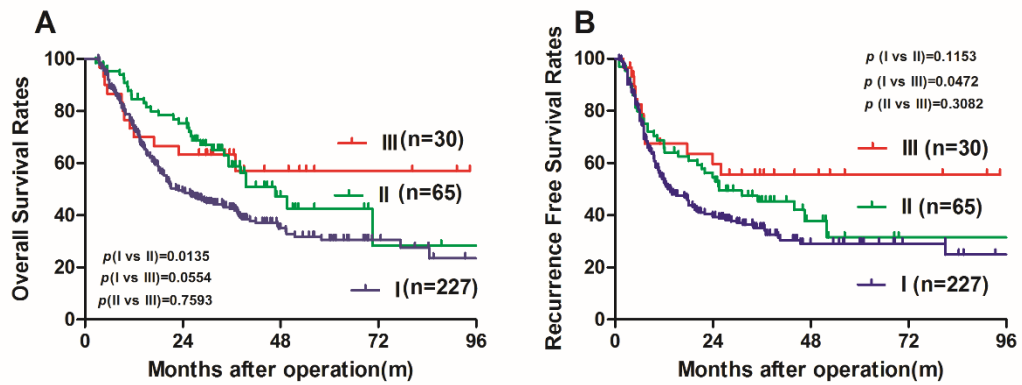

**Supplementary Figure 3. Prognostic values of prognostic nutritional index (PNI) using Kaplan-Meier analysis (Cohort 1,  $n=322$ ).**

Kaplan-Meier analysis for overall survival according to PNI (A). Kaplan-Meier analysis for recurrence-free survival according to PNI (B). The Prognostic Nutritional Index (PNI) was defined as follows: Albumin (g/l) + 5 × lymphocyte count × 10<sup>9</sup>/l ≥ 45, I; Albumin (g/l) + 5 × lymphocyte count × 10<sup>9</sup>/l ≥ 40 & < 45, II; Albumin (g/l) + 5 × lymphocyte count × 10<sup>9</sup>/l < 40, III.

**Supplementary Table 1. The clinicopathologic characteristics of ICC patients in the validation cohort**

**(Cohort 2, n=126)**

| Clinicopathological Indexes        |           | LMR |      |        | CA19-9 |      |              | SIS |    |     |               |
|------------------------------------|-----------|-----|------|--------|--------|------|--------------|-----|----|-----|---------------|
|                                    |           | low | high | P      | low    | high | P            | I   | II | III | P             |
| Age(year)                          | ≤50       | 21  | 13   | 0.895  | 21     | 13   | 0.984        | 11  | 12 | 11  | 0.287         |
|                                    | >50       | 58  | 34   |        | 57     | 35   |              | 22  | 47 | 23  |               |
| Sex                                | female    | 24  | 19   | 0.250  | 28     | 15   | 0.593        | 13  | 21 | 9   | 0.509         |
|                                    | male      | 55  | 28   |        | 50     | 33   |              | 20  | 38 | 25  |               |
| HBsAg                              | negative  | 50  | 30   | 0.952  | 50     | 30   | 0.856        | 21  | 34 | 25  | 0.308         |
|                                    | positive  | 29  | 17   |        | 28     | 18   |              | 12  | 25 | 9   |               |
| HCV                                | negative  | 78  | 46   | 1*     | 77     | 47   | 1*           | 33  | 58 | 33  | 1*            |
|                                    | positive  | 1   | 1    |        | 1      | 1    |              | 0   | 1  | 1   |               |
| AFP (ng/ml)                        | ≤20       | 72  | 46   | 0.256* | 73     | 45   | 1*           | 33  | 53 | 32  | 0.177*        |
|                                    | >20       | 7   | 1    |        | 5      | 3    |              | 0   | 6  | 2   |               |
| Child-Pugh                         | A         | 77  | 46   | 1*     | 77     | 46   | 0.557*       | 33  | 57 | 33  | 0.376*        |
|                                    | B or C    | 2   | 1    |        | 1      | 2    |              | 0   | 2  | 1   |               |
| Liver cirrhosis                    | no        | 59  | 33   | 0.585  | 56     | 36   | 0.694        | 21  | 45 | 26  | 0.379         |
|                                    | yes       | 20  | 14   |        | 22     | 12   |              | 12  | 14 | 8   |               |
| Tumor size (cm)                    | ≤5        | 36  | 24   | 0.550  | 44     | 16   | <b>0.012</b> | 20  | 31 | 9   | <b>0.012</b>  |
|                                    | >5        | 43  | 23   |        | 34     | 32   |              | 13  | 28 | 25  |               |
| Tumor number                       | single    | 62  | 36   | 0.806  | 60     | 38   | 0.769        | 24  | 48 | 26  | 0.620         |
|                                    | multiple  | 17  | 11   |        | 18     | 10   |              | 9   | 11 | 8   |               |
| Lymphonodus node metastasis        | yes       | 21  | 5    | 0.032  | 10     | 16   | <b>0.006</b> | 0   | 15 | 11  | <b>0.002*</b> |
|                                    | no        | 58  | 42   |        | 68     | 32   |              | 33  | 44 | 23  |               |
| Microvascular invasion             | yes       | 17  | 9    | 0.751  | 14     | 12   | 0.342        | 6   | 11 | 9   | 0.615         |
|                                    | no        | 62  | 38   |        | 64     | 36   |              | 27  | 48 | 25  |               |
| Tumor differentiation <sup>a</sup> | poor      | 22  | 8    | 0.212  | 18     | 12   | 0.606        | 5   | 16 | 9   | 0.293         |
|                                    | moderated | 45  | 27   |        | 47     | 25   |              | 19  | 36 | 17  |               |
|                                    | well      | 12  | 12   |        | 13     | 11   |              | 9   | 7  | 8   |               |
| TNM stage <sup>b</sup>             | I+II      | 56  | 39   | 0.127  | 65     | 30   | <b>0.008</b> | 31  | 42 | 22  | <b>0.008*</b> |
|                                    | III+IVA   | 23  | 8    |        | 13     | 18   |              | 2   | 17 | 12  |               |

Boldface type indicates significant values.

Abbreviations: AFP, alpha-fetoprotein; CA19-9, carbohydrate antigen 19-9; HBsAg, hepatitis B surface antigen; HCV, hepatitis C virus; LMR, lymphocyte-to-monocyte ratio; TNM, tumor-node-metastasis; SIS, combination of preoperative serum CA19-9 and LMR. I, CA19-9<sup>Low</sup>/LMR<sup>High</sup>; II, CA19-9<sup>High</sup>/LMR<sup>High</sup> and CA19-9<sup>Low</sup>/LMR<sup>Low</sup>; III, CA19-9<sup>High</sup>/LMR<sup>Low</sup>.

<sup>a</sup> Tumor differentiation was determined according to the “British Society of Gastroenterology guidelines on the management of cholangiocarcinoma”.

<sup>b</sup> TNM stage: American Joint Committee on Cancer 7th edition staging for intrahepatic cholangiocarcinoma.

\*Fisher's exact tests; chi-square tests for all other analyses.

**Supplementary Table 2. Multivariate Cox regression analyses in the validation cohort (Cohort 2, n=126)**

| Variable                                       | TTR                  |              | OS                    |              |
|------------------------------------------------|----------------------|--------------|-----------------------|--------------|
|                                                | HR (95% CI)          | P            | HR (95% CI)           | P            |
| <i>Univariate analysis</i>                     |                      |              |                       |              |
| Age, year (≤50 vs. >50)                        | 0.934 (0.580- 1.504) | 0.779        | 0.813 (0.515- 1.281)  | 0.372        |
| Sex (female vs. male)                          | 1.516 (0.925- 2.484) | 0.099        | 1.234 (0.768- 1.983)  | 0.386        |
| HBsAg (negative vs. positive)                  | 1.426 (0.881- 2.307) | 0.149        | 1.618 (1.020- 2.566)  | <b>0.041</b> |
| HCV (negative vs. positive)                    | 0.252 (0.034- 1.853) | 0.176        | 0.197 (0.026- 1.458)  | 0.112        |
| AFP, ng/ml (≤20 vs. >20)                       | 0.411 (0.146- 1.162) | 0.094        | 0.330 (0.118- 0.917)  | <b>0.033</b> |
| Child-Pugh (A vs. B or C)                      | 0.815 (0.198- 3.352) | 0.777        | 0.411 (0.057- 2.980)  | 0.379        |
| Liver cirrhosis (no vs. yes)                   | 1.248 (0.748- 2.085) | 0.396        | 1.205 (0.726- 1.999)  | 0.471        |
| Tumor size, cm (≤5 vs. >5)                     | 1.170 (0.745- 1.837) | 0.496        | 1.189 (0.764- 1.850)  | 0.443        |
| Tumor number (single vs. multiple)             | 1.241(0.725- 2.125)  | 0.431        | 1.412 (0.842- 2.368)  | 0.191        |
| Lymphonodus node metastasis (no vs. yes)       | 2.622 (1.533- 4.484) | <b>0.000</b> | 2.634 (1.551- 4.472)  | <b>0.000</b> |
| Microvascular invasion (no vs. yes)            | 1.469 (0.873- 2.473) | 0.148        | 0.880 (0.501- 1.545)  | 0.656        |
| Tumor differentiation <sup>a</sup> (P vs. M,W) | 1.367 (0.865- 2.160) | 0.181        | 1.017 (0.646- 1.600)  | 0.943        |
| TNM stage <sup>b</sup> (I+II vs. III+IVA)      | 2.512 (1.525- 4.138) | <b>0.000</b> | 2.360 (1.443- 3.860)  | <b>0.001</b> |
| NLR (low vs. high)                             | 1.618 (1.018- 2.571) | <b>0.042</b> | 1.958 (1.232- 3.111)  | <b>0.004</b> |
| LMR (low vs. high)                             | 0.538 (0.327- 0.884) | <b>0.014</b> | 0.511 (0.312- 0.837)  | <b>0.008</b> |
| CA19-9, U/ml (≤89 vs. >89)                     | 2.720 (1.669-4.434)  | <b>0.000</b> | 3.549 (2.222- 5.669)  | <b>0.000</b> |
| SIS                                            |                      |              |                       |              |
| I                                              | 1 (Referent)         |              | 1 (Referent)          |              |
| II                                             | 2.283 (1.207-4.319)  | <b>0.011</b> | 2.296 (1.182- 4.458)  | <b>0.014</b> |
| III                                            | 4.590 (2.268-9.293)  | <b>0.000</b> | 5.988(3.007-11.925)   | <b>0.000</b> |
| <i>Multivariate analysis<sup>1</sup></i>       |                      |              |                       |              |
| HBsAg (negative vs. positive)                  | 1.030 (0.606- 1.730) | 0.931        | 1.216 (0.738- 2.003)  | 0.444        |
| HCV (negative vs. positive)                    | 0.299 (0.037- 2.433) | 0.259        | 0.193 (0.024- 1.578)  | 0.125        |
| Lymphonodus node metastasis (no vs. yes)       | 0.843 (0.314- 2.263) | 0.734        | 1.807 (1.071- 3.051)  | <b>0.027</b> |
| TNM <sup>b</sup> (I+II vs. III+IVA)            | 1.944 (1.944- 3.277) | <b>0.013</b> | 1.223 (0.453- 3.299)  | 0.691        |
| NLR (low vs. high)                             | 1.077 (0.638- 1.819) | 0.781        | 1.471 (0.894- 2.421)  | 0.129        |
| LMR (low vs. high)                             | 0.613 (0.371- 1.013) | 0.056        | 0.465 (0.223- 0.969)  | <b>0.041</b> |
| CA19-9, U/ml (≤89 vs. >89)                     | 2.377 (1.438- 3.932) | <b>0.001</b> | 3.115 (1.926- 5.036)  | <b>0.000</b> |
| SIS                                            |                      |              |                       |              |
| I                                              | 1 (Referent)         |              | 1 (Referent)          |              |
| II                                             | 2.083 (1.091- 3.976) | <b>0.026</b> | 3.213 (1.365- 7.565)  | <b>0.008</b> |
| III                                            | 3.946 (1.913- 8.138) | <b>0.000</b> | 9.666 (3.411- 27.394) | <b>0.000</b> |

Boldface type indicates significant values.

<sup>1</sup> Analysis including LMR, CA19-9, and SIS.

Analyses were conducted using univariate analysis or multivariate Cox proportional hazards regression.

Abbreviations: AFP, alpha-fetoprotein; CA19-9, carbohydrate antigen 19-9; HBsAg, hepatitis B surface antigen; HCV, hepatitis C virus; LMR, lymphocyte-to-monocyte ratio; NLR, neutrophil-to-lymphocyte ratio; TTR, time to recurrence; OS, overall survival; TNM, tumor-node-metastasis; CI, confidential interval; HR, hazard ratio; P, poor differentiation; M, moderated differentiation; W, well differentiation; SIS, combination of preoperative serum CA19-9 and LMR. I, CA19-9<sup>Low</sup>/LMR<sup>High</sup>; II, CA19-9<sup>High</sup>/LMR<sup>High</sup> and CA19-9<sup>Low</sup>/LMR<sup>Low</sup>; III, CA19-9<sup>High</sup>/LMR<sup>Low</sup>.

<sup>a</sup> Tumor differentiation was determined according to the “British Society of Gastroenterology guidelines on the management of cholangiocarcinoma”.

<sup>b</sup> TNM stage: American Joint Committee on Cancer 7th edition staging for intrahepatic cholangiocarcinoma.
